# Supplementary material
Source: PubMed Central journal article supplement (PMC3983391)
Supplement: jm4016526_si_001.pdf [file jm4016526_si_001.pdf]

## Supporting Information

### Optimization of 4-(*N*-cycloamino)phenylquinazolines as a novel class of tubulin polymerization inhibitors targeting the colchicine site

Xiao-Feng Wang,<sup>†,#</sup> Fang Guan,<sup>†</sup> Emika Ohkoshi,<sup>‡</sup> Wanjun Guo,<sup>‡</sup> Lili Wang,<sup>†</sup> Dong-Qing Zhu,<sup>†</sup> Sheng-Biao Wang,<sup>†</sup> Li-Ting Wang,<sup>‡</sup> Ernest Hamel,<sup>§</sup> Dexuan Yang,<sup>‡</sup> Linna Li,<sup>‡</sup> Keduo Qian,<sup>‡</sup> Susan L. Morris-Natschke,<sup>‡</sup> Shoujun Yuan,<sup>‡</sup> Kuo-Hsiung Lee,<sup>‡,⊥,\*</sup> Lan Xie<sup>†,\*</sup>

<sup>†</sup>*Beijing Institute of Pharmacology and Toxicology, 27 Tai-Ping Road, Beijing, 100850, China*

<sup>‡</sup>*Natural Products Research Laboratories, UNC Eshelman School of Pharmacy, University of North Carolina at Chapel Hill, NC 27599, USA*

<sup>‡</sup>*Beijing Institute of Radiation Medicine, 27 Tai-Ping Road, Beijing, 100850, China*

<sup>§</sup>*Screening Technologies Branch, Developmental Therapeutics Program, Division of Cancer Treatment and Diagnosis, National Cancer Institute, Frederick National Laboratory for Cancer Research, National Institutes of Health, Frederick, Maryland 21702, USA*

<sup>#</sup>*Pharmacy Department, Urumqi General Hospital, Lanzhou Military Region, Urumqi, 830000, China*

<sup>⊥</sup>*Chinese Medicine Research and Development Center, China Medical University and Hospital, Taichung, Taiwan*

\* Corresponding author. Tel/fax: +86 10 66931690. E-mail address: lanxie4@gmail.com (L. Xie);

[Tel: 919-962-0066. Fax: 919-966-3893. E-mail address: khlee@unc.edu \(K.H. Lee\).](mailto:khlee@unc.edu)

Formatted: Left

## 1. HPLC purity and conditions:

Purities of active target compounds were determined by using an Agilent HPLC-1200 with UV detector and an Agilent Eclipse XDB-C18 column (150 mm × 4.6 mm, 5 μm), flow rate 0.8 mL/min, UV detection at 254 nm and an injection volume of 15 μL. Elution was performed with a mixture of solvents, acetonitrile (A) and water (B) (condition 1) or methanol (A) and water (B) (condition 2). For **4b**, **4c**, **5c**, **5e**, **5g**, and **5h**, solvent B contained 0.04% ammonium acetate in condition 1.

**Table 1** HPLC purity data of active target compounds

| Compounds | Condition-1 (ACN/H <sub>2</sub> O) |                      |          | Condition-2 (MeOH/H <sub>2</sub> O) |                      |          |
|-----------|------------------------------------|----------------------|----------|-------------------------------------|----------------------|----------|
|           | Solvent Ratio                      | Retention time (min) | Purity % | Solvent Ratio                       | Retention time (min) | Purity % |
| <b>4a</b> | 70/30                              | 14.5                 | 99.5     | 80/20                               | 10.20                | 99.1     |
| <b>4b</b> | 70/30                              | 7.08                 | 100.0    | 85/15                               | 6.85                 | 99.6     |
| <b>4c</b> | 70/30                              | 7.94                 | 98.1     | 85/15                               | 7.20                 | 98.8     |
| <b>5a</b> | 60/40                              | 4.22                 | 96.9     | 70/30                               | 6.62                 | 96.8     |
| <b>5b</b> | 70/30                              | 2.86                 | 100.0    | 80/20                               | 3.49                 | 98.6     |
| <b>5c</b> | 60/40                              | 2.35                 | 98.8     | 75/25                               | 3.43                 | 97.9     |
| <b>5d</b> | 60/40                              | 6.98                 | 100.0    | 75/25                               | 7.06                 | 100.0    |
| <b>5e</b> | 60/40                              | 4.42                 | 100.0    | 75/25                               | 6.22                 | 100.0    |
| <b>5f</b> | 60/40                              | 1.89                 | 98.9     | 70/30                               | 5.54                 | 98.9     |
| <b>5g</b> | 60/40                              | 3.17                 | 98.8     | 75/25                               | 4.40                 | 98.1     |
| <b>5h</b> | 70/30                              | 4.17                 | 95.1     | 85/15                               | 4.49                 | 95.7     |
| <b>5i</b> | 70/30                              | 5.22                 | 100.0    | 85/15                               | 4.25                 | 100.0    |
| <b>5j</b> | 70/30                              | 8.80                 | 100.0    | 85/15                               | 5.90                 | 99.7     |
| <b>5k</b> | 70/30                              | 8.40                 | 98.5     | 80/20                               | 8.74                 | 96.2     |

## 2. Cell cycle analysis:

It was performed after treatment of cells with **5f** using a FACSCalibur (BD Biosciences, Mountain View, CA). A549 cells were treated with 1 nM and 3 nM **5f** for 24 h. Cell cycle distribution was analyzed by the standard propidium iodide procedure as mentioned under the Experimental Section.

**Table 2** Cell cycle distribution data of A549 cells treated with **5f**

| Compound<br>(contribution) | % of cells  |         |            |
|----------------------------|-------------|---------|------------|
|                            | G0/G1 phase | S phase | G2/M phase |
| control                    | 72.91       | 18.77   | 8.31       |
| Colchicine (100 nM)        | 31.60       | 22.08   | 46.32      |
| Colchicine (300 nM)        | 9.75        | 16.75   | 73.49      |
| <b>5f</b> (1 nM)           | 56.59       | 21.52   | 21.89      |
| <b>5f</b> (3 nM)           | 3.74        | 12.45   | 83.81      |
